# Supplementary material
Source: Springer Nature journal article supplement (https://www.springermedizin.de/resource/supplementary/13256_2014_3018_MOESM2_ESM.pdf/9651070)

Before  
embolization

After  
embolization

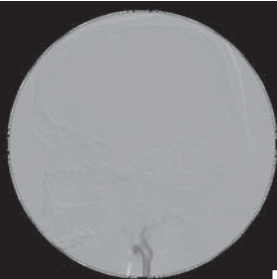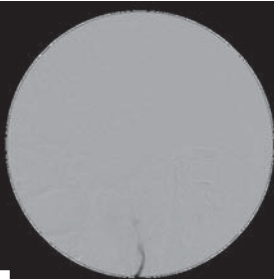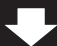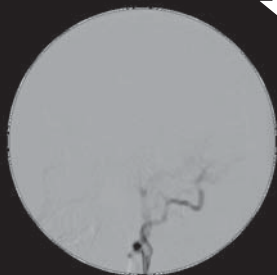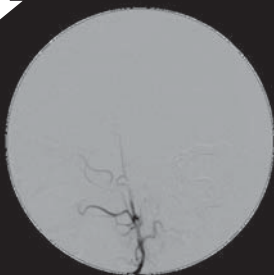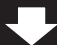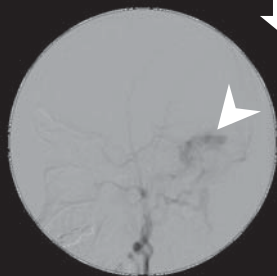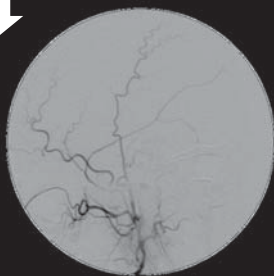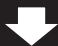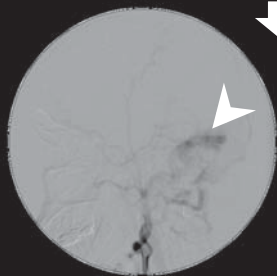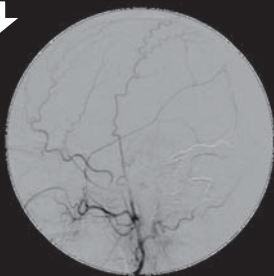

Supplement: MOESM2 [file 9651070]
